# Supplementary material for: A triple helical structure supported solely by C–H?O hydrogen bonding
Source: Royal Society of Chemistry journal article supplement (doi:10.1039/c1cc15656j), 2011-12-13
Supplement: c1cc15656j.pdf [file c1cc15656j.pdf]

1 **Electronic Supplementary Information**

2

3 **A triple helical structure supported solely by C–H...O hydrogen bond**

4 Kwang-Ming Lee, Jack C. C. Chen, Hsing-Yin Chen,\* and Ivan J. B. Lin\*

5 \*To whom correspondence should be addressed. E-mail: hychen@kmu.edu.tw; Phone:  
6 (+886)73121101 #2807; Fax: (+886)73125339; E-mail: ijblin@mail.ndhu.edu.tw;  
7 Phone: (+886)3863359; Fax: (+886)3863357

8

9

10

11

12

|    |                                                                                 |    |
|----|---------------------------------------------------------------------------------|----|
| 13 | 1. <b>X-ray crystallographic analysis</b> .....                                 | S2 |
| 14 | 2. <b>Computational method</b> .....                                            | S3 |
| 15 | 3. <b>Figure S1.</b> Molecular mechanics optimized structure for a nanomer..... | S5 |
| 16 | 4. <b>Figure S2.</b> Molecular structure and crystal packing of <b>2</b> .....  | S6 |
| 17 | 5. <b>Crystal data for 1</b> .....                                              | S7 |
| 18 | 6. <b>References</b> .....                                                      | S8 |

19

20

21

22

23

24

25

26

27

28

29

30

31

32

### 33 X-ray crystallographic analysis

34 Single-crystal X-ray diffraction data of 1 were collected by using a Bruker P4  
35 diffractometer with a graphite monochromator using Mo-K radiation ( $\lambda = 0.71073 \text{ \AA}$ )  
36 in  $\omega$  scan modes. All structures were solved by the direct method and refined (based  
37 on  $F^2$  using all independent data) by full matrix least-squares methods (Bruker  
38 SHELXTL 97).<sup>S1</sup> The  $\text{PF}_6^-$  anion is found to be disordered with two independent  
39 orientations having occupancies of 0.5 and 0.5. Non-hydrogen atoms were refined  
40 with anisotropic thermal parameters. Hydrogen atoms were found in a difference map.

41  
42  
43  
44  
45  
46  
47  
48  
49  
50  
51  
52  
53  
54  
55  
56  
57  
58  
59  
60  
61  
62

## 63 **Computational method**

64 The density functional theory (DFT) M06-2X/6-311++G\*\* and *ab initio*  
65 MP2/6-311++G\*\* calculations were used to evaluate the binding energies of the  
66 selected dimers and model complexes. The M06-2X functional developed by Truhlar  
67 and co-workers has been shown to bear considerably improved performance in  
68 describing diverse noncovalent weak interactions,<sup>S2</sup> which are a familiar drawback for  
69 other popular functionals, and thus is a suitable choice for the purpose of the present  
70 study. The coordinates for the selected dimers and the model complexes were  
71 extracted from the crystal structure; for the model complexes, hydrogen atoms were  
72 added to complete the valence. The geometry optimizations and frequency analyses  
73 for the hexamer in acetonitrile and water were carried out at M06-2X/6-31G level  
74 under the consideration of solvent effect. The reported association free energies for  
75 the hexamer in water and acetonitrile have been corrected for the standard state of 1  
76 M in solution instead of 1 atm in gas phase, which is the default implementation in  
77 most quantum chemistry packages. The inclusion of the solvent effect was achieved  
78 by using the integral equation formalism version of the polarization continuum model.  
79 Natural population analysis was applied to obtain the atomic charge distribution for  
80 the hexamer. All the DFT and *ab initio* calculations were performed by Gaussian 09  
81 program.<sup>S3</sup> For the molecular mechanics (MM) calculation of the nanomer, we used

82 the OPLS force field supplemented by the M06-2X/6-311++G\*\* derived atomic  
83 charges. The triple helix of the nanomer was placed in a 45 Å × 45 Å × 45 Å periodic  
84 box of 3010 TIP3P water molecules.<sup>S4</sup> The truncation of nonbonded potential energy  
85 was treated by a potential switching function turned on at a distance of 11 Å and  
86 turned off at a distance of 15 Å. The MM calculation was achieved by HyperChem  
87 package.<sup>S5</sup>

88  
89  
90  
91  
92  
93  
94  
95  
96  
97  
98  
99  
100  
101  
102  
103  
104  
105  
106  
107  
108  
109  
110  
111  
112  
113  
114

115  
116  
117  
118  
119  
120

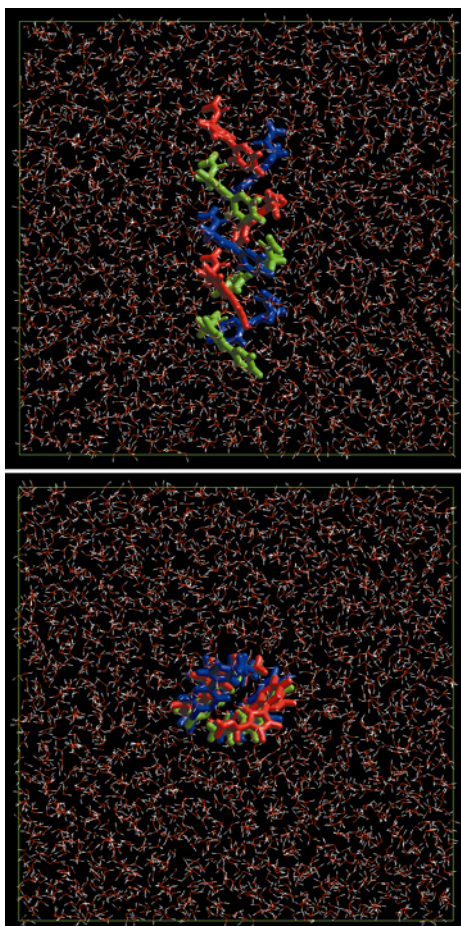

121  
122  
123  
124  
125  
126  
127  
128  
129  
130  
131  
132  
133  
134

**Fig. S1** The molecular mechanics optimized structure for a nanomer in a  $45 \text{ \AA} \times 45 \text{ \AA} \times 45 \text{ \AA}$  box filled with 3010 water molecules. Top panel: the view perpendicular to the axis. Bottom panel: the view along the helical axis.

135  
136  
137  
138  
139

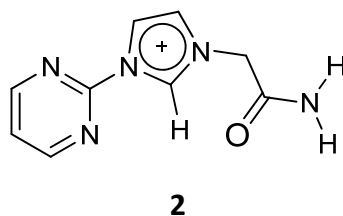

140  
141

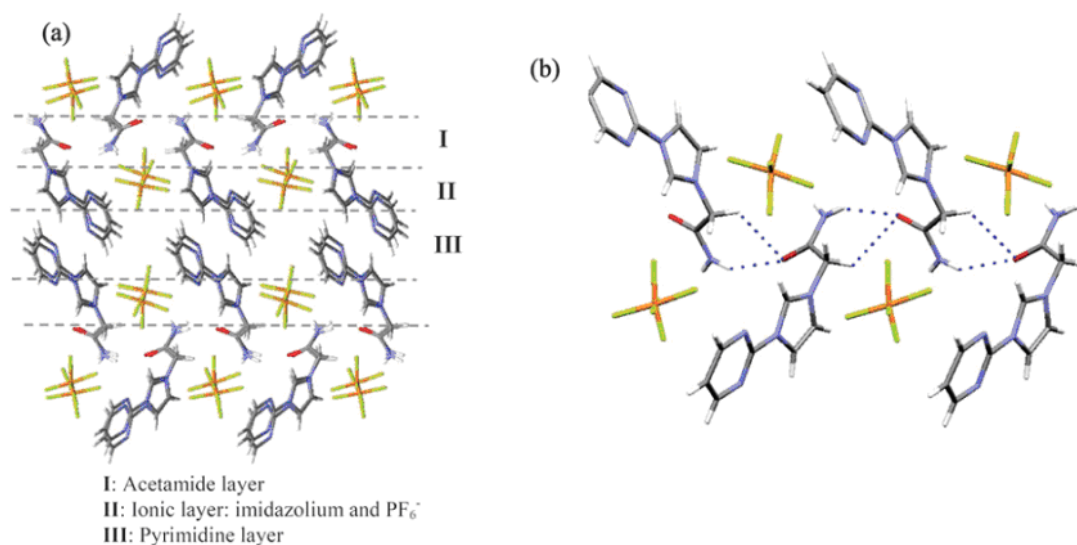

142  
143  
144  
145  
146  
147  
148  
149  
150  
151  
152  
153  
154  
155  
156  
157  
158

**Fig. S2** The molecular structure of 1-acetamido-3-(2-pyrimidyl)-imidazolium cation (2) and the crystal packing of its  $\text{PF}_6^-$  salt. (a) Stacking of the tri-layer structure. (b) One-dimensional anti-oriented catemer was formed by  $\text{N-H}\cdots\text{O}$  and  $\text{C-H}\cdots\text{O}$  hydrogen bonds.

159 **Crystal data for 1:**

|                                                                                        |                                                                 |
|----------------------------------------------------------------------------------------|-----------------------------------------------------------------|
| Chemical formula                                                                       | C <sub>9</sub> H <sub>10</sub> F <sub>6</sub> N <sub>5</sub> OP |
| Formula Mass                                                                           | 349.19                                                          |
| Crystal system                                                                         | Orthorhombic                                                    |
| <i>a</i> /Å                                                                            | 5.5476(8)                                                       |
| <i>b</i> /Å                                                                            | 11.7755(16)                                                     |
| <i>c</i> /Å                                                                            | 20.368(2)                                                       |
| $\alpha$ /°                                                                            | 90                                                              |
| $\beta$ /°                                                                             | 90                                                              |
| $\gamma$ /°                                                                            | 90                                                              |
| Unit cell volume/Å <sup>3</sup>                                                        | 1330.5(3)                                                       |
| Temperature/K                                                                          | 293(2)                                                          |
| Space group                                                                            | <i>P</i> 2 <sub>1</sub> 2 <sub>1</sub> 2 <sub>1</sub>           |
| No. of formula units per unit cell, <i>Z</i>                                           | 4                                                               |
| Radiation type                                                                         | MoK $\alpha$                                                    |
| Absorption coefficient, $\mu$ /mm <sup>-1</sup>                                        | 0.288                                                           |
| No. of reflections measured                                                            | 2785                                                            |
| No. of independent reflections                                                         | 2346                                                            |
| <i>R</i> <sub>int</sub>                                                                | 0.0172                                                          |
| Final <i>R</i> <sub><i>I</i></sub> values ( <i>I</i> > 2 $\sigma$ ( <i>I</i> ))        | 0.0368                                                          |
| Final <i>wR</i> ( <i>F</i> <sup>2</sup> ) values ( <i>I</i> > 2 $\sigma$ ( <i>I</i> )) | 0.0944                                                          |
| Final <i>R</i> <sub><i>I</i></sub> values (all data)                                   | 0.0427                                                          |
| Final <i>wR</i> ( <i>F</i> <sup>2</sup> ) values (all data)                            | 0.0993                                                          |
| Goodness of fit on <i>F</i> <sup>2</sup>                                               | 1.036                                                           |
| Flack parameter                                                                        | -0.02(14)                                                       |
| CCDC number                                                                            | 180990                                                          |

160  
161  
162  
163  
164  
165  
166  
167  
168  
169  
170

171 **References**

- 172 [S1] G. M. Sheldrick, *Acta Crystallogr.* 2008, **A64**, 112.
- 173 [S2] Y. Zhao and D. G. Truhlar, *Acc. Chem. Res.* 2008, **41**, 157.
- 174 [S3] Gaussian 09, Revision A.02, M. J. Frisch, G. W. Trucks, H. B. Schlegel, G. E.  
175 Scuseria, M. A. Robb, J. R. Cheeseman, G. Scalmani, V. Barone, B. Mennucci, G. A.  
176 Petersson, H. Nakatsuji, M. Caricato, X. Li, H. P. Hratchian, A. F. Izmaylov, J. Bloino,  
177 G. Zheng, J. L. Sonnenberg, M. Hada, M. Ehara, K. Toyota, R. Fukuda, J. Hasegawa,  
178 M. Ishida, T. Nakajima, Y. Honda, O. Kitao, H. Nakai, T. Vreven, J. A. Montgomery,  
179 Jr., J. E. Peralta, F. Ogliaro, M. Bearpark, J. J. Heyd, E. Brothers, K. N. Kudin, V. N.  
180 Staroverov, R. Kobayashi, J. Normand, K. Raghavachari, A. Rendell, J. C. Burant, S.  
181 S. Iyengar, J. Tomasi, M. Cossi, N. Rega, J. M. Millam, M. Klene, J. E. Knox, J. B.  
182 Cross, V. Bakken, C. Adamo, J. Jaramillo, R. Gomperts, R. E. Stratmann, O. Yazyev,  
183 A. J. Austin, R. Cammi, C. Pomelli, J. W. Ochterski, R. L. Martin, K. Morokuma, V. G.  
184 Zakrzewski, G. A. Voth, P. Salvador, J. J. Dannenberg, S. Dapprich, A. D. Daniels, O.  
185 Farkas, J. B. Foresman, J. V. Ortiz, J. Cioslowski and D. J. Fox, Gaussian, Inc.,  
186 Wallingford CT, 2009.
- 187 [S4] W. L. Jorgensen, J. Chandrasekhas, J. D. Madura, R. W. Impey and M. L. Klein,  
188 *J. Chem. Phys.* 1983, **79**, 926.
- 189 [S5] HyperChem Professional 8.0.3, Hypercube, Inc., 1115 NW 4th Street,  
190 Gainesville, FL 32601.
